# Supplementary material
Source: publisher site journal article supplement (https://zookeys.pensoft.net/article/68316/download/suppl/33/)
Supplement: Supplementary file

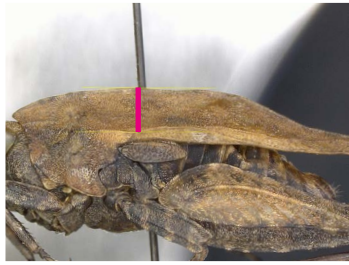

A

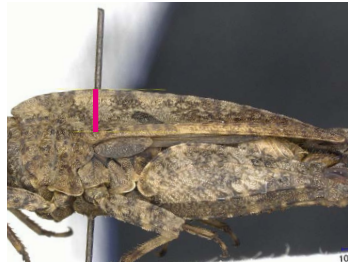

B

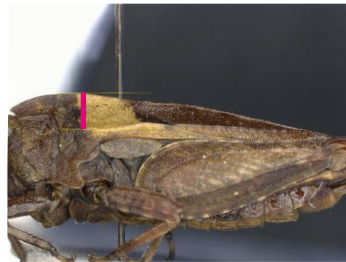

C

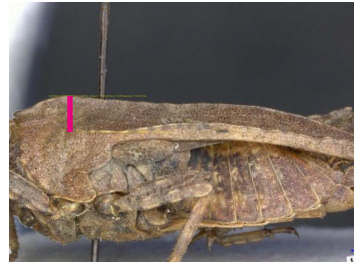

D

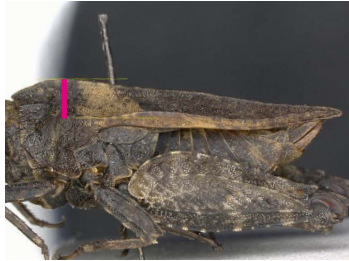

E

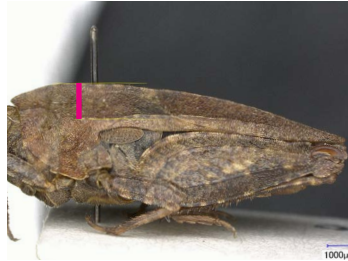

F

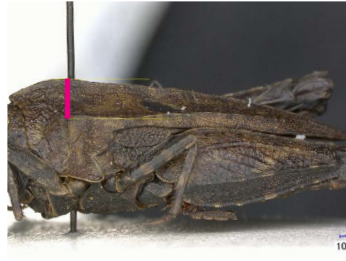

G

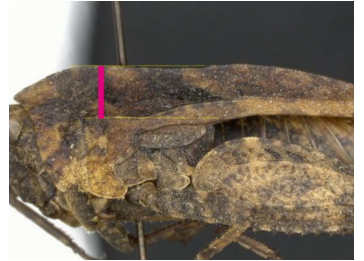

H

Supplementary Figure 2. Variation in pronotum shape (lateral view) of some *Tetrix* females included in the morphometric analyses. **A–D:** *bipunctata*; **E–H:** *kraussi*. The position where pronotum height was measured is indicated by a magenta line.
